# Supplementary material for: The Contribution of Secondary Particles Following Carbon Ion Radiotherapy to Soft Errors in CIEDs
Source: PubMed Central journal article supplement — IEEE Open J Eng Med Biol. 2024 Jan 26;5:157–62. doi: 10.1109/OJEMB.2024.3358989 (PMC10939317; doi:10.1109/ojemb.2024.3358989), 2024-01-26
Supplement: supp1-3358989.pdf [file supp1-3358989.pdf]

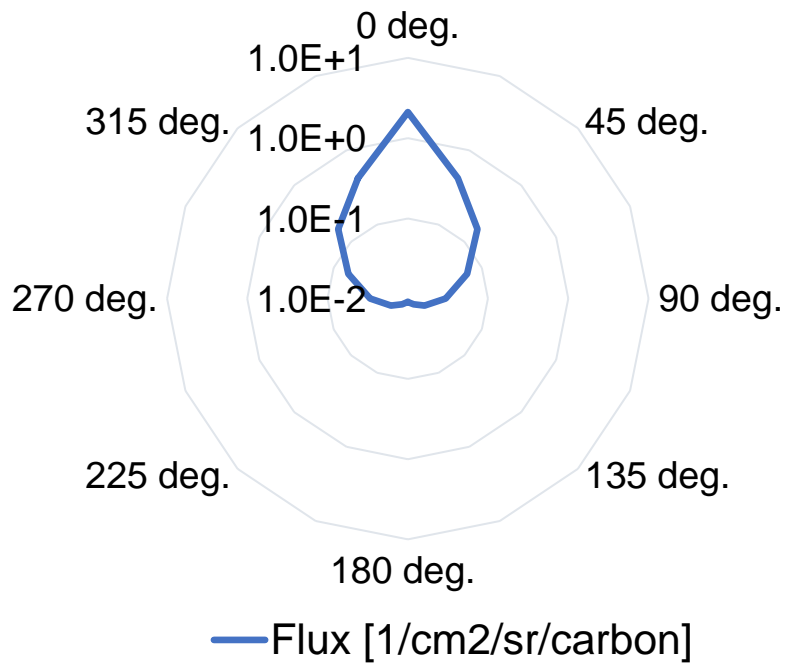

Supplemental Fig.1 The angular distribution of neutrons evaluated via PHITS calculations.

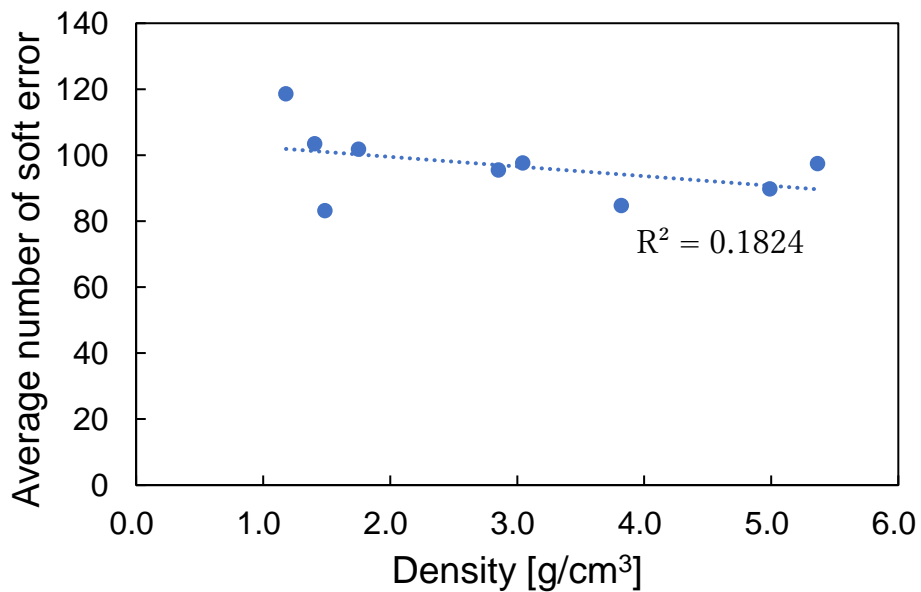

Supplemental Fig.2 Density dependence of the number of soft errors. The dotted line indicates approximate curves, and R<sup>2</sup> indicates the coefficient of determination.
